# Supplementary material for: Dispersal distances and migration rates at the arctic treeline in Siberia – a genetic and simulation based study
Source: Copernicus journal article supplement (doi:10.5194/bg-2018-267), 2018-06-18
Supplement: Supplementary file 1 [file bg-2018-267-supplement.pdf]

S1 Genetic analyses

Table S1. Summary table of the eight loci applied for the 11 subpopulations from the Taymyr Peninsula, sorted by decreasing population genetic differentiation value  $F_{ST}$ . Observed and expected heterozygosity are given by HO and HE, respectively.

| No. | Locus <sup>1</sup> | Multiplex <sup>2</sup> | TAG <sup>3</sup> | Observed fragment length (bp) | Number of alleles |
|-----|--------------------|------------------------|------------------|-------------------------------|-------------------|
| 1   | bcLK253            | 1                      | Q3               | 211-247                       | 16.99±0.39        |
| 2   | Ld101              | 1                      | Q4               | 196-236                       | 15.74±0.79        |
| 3   | bcLK228            | 2                      | Q4               | 133-269                       | 18.70±0.66        |
| 4   | bcLK189            | 3                      | Q2               | 152-242                       | 33.39±1.50        |
| 5   | bcLK211            | 1                      | Q2               | 194-250                       | 22.97±1.09        |
| 6   | Ld42               | 3                      | Q4               | 187-201                       | 7.86±0.35         |
| 7   | bcLK056            | 2                      | Q1               | 154-256                       | 31.79±1.05        |
| 8   | bcLK263            | 2                      | Q2               | 198-280                       | 39.77±0.96        |

<sup>1</sup> Locus – marker names beginning ‘bcLK’ are developed by Isoda and Watanabe (2006) and those with ‘Ld’ by Wagner et al., (2012); <sup>2</sup> Multiplex – number indicates the three primer mixes applied in a simultaneous PCR; <sup>3</sup> TAG - TAG – tailing sequence at forward primer: Q1 = TGTAACGACGGCCAGT (Schuelke, 2000); Q2 = TAGGAGTGCAGCAAGCAT; Q3 = CACTGCTTAGAGCGATGC; Q4 = CTAGTTATTGCTCAGCGGT (Q2–Q4, after Culley et al. (2008))).

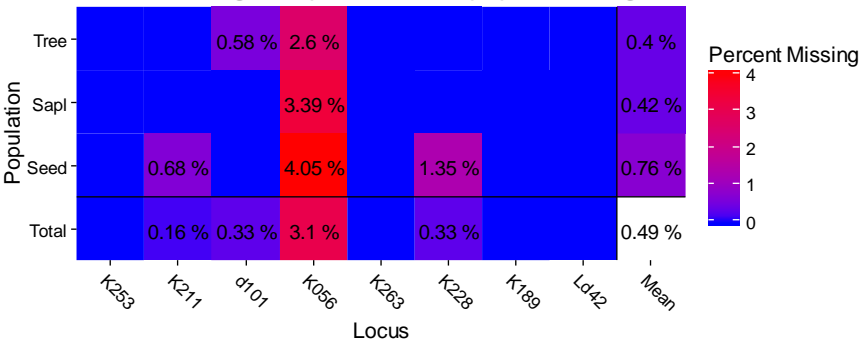

Figure S1. Fraction of missing alleles for each of three height classes – tree, sapling (Sapl), and seedling (Seed) (y-axis) and locus (x-axis) within each height class and the average value.

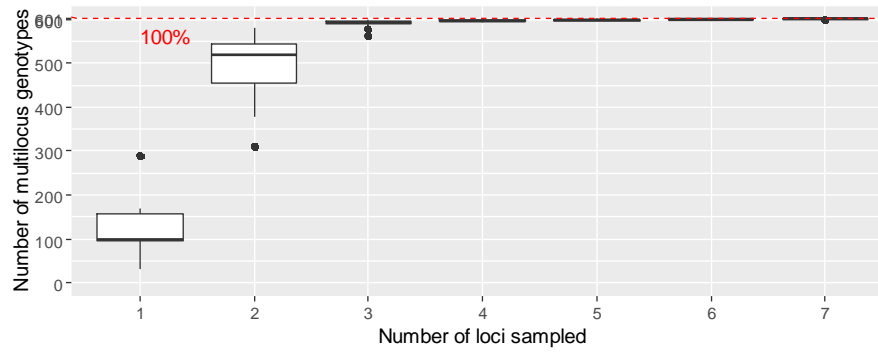

**Figure S2. Genotype accumulation curve showing convergence at 5-7 loci from which nearly all 601 tested individuals can be differentiated.**

## ***S1.1 Allele diversity***

### ***S1.1.1 Introduction***

- 25 The number of alleles per loci was analysed separately in three height classes: ‘seedling’ <0.4 m, ‘sapling’ – taller than seedlings but <2 m, and ‘tree’ >2 m. For the analyses, we resampled the dataset to avoid errors introduced by sample size. This was achieved by constructing 100 datasets from 30 randomly selected individuals of each height class. To check whether the loci were under the null expectation of the Hardy-Weinberg equilibrium,  $\chi^2$ -tests were performed on the observed allele frequencies (‘hw.test’-function in ‘pegas’-library version 0.9 (Paradis, 2010)).
- 30 To exclude errors introduced by clonal reproduction we used clone-censored datasets for the analyses. By using all eight loci we could distinguish between all genotyped individuals. We identified 601 separate individuals and 11 clones (Fig. 3a). The members of one genetically identical group were up to 30 m distant from each other; similar distances were found for black spruce stunted forms (Gamache et al., 2003; Laberge et al., 2000).

### ***S1.1.2 Results***

- 35 The number of alleles per locus was nearly equal among all height classes with two exceptions at locus bcLK189 and bcLK263, at which the allele number was slightly smaller for seedlings. Individuals of all height classes showed significant heterozygote deficits with an observed mean of ~0.69 and an expected heterozygosity of ~0.86 ( $p < 0.001$ , Table S2, Figure S4). At two loci (bcLK253 and bcLK263) observed values were close to the expected ratio and thus did not differ significantly from the Hardy-Weinberg equilibrium (Table S2).

### ***S1.1.3 Discussion***

- 40 The analysed tree stand is characterised by a high gene diversity (number of alleles and expected heterozygosity of ~86%) compared to other studies which used the same or parts of the same markers (Babushkina et al., 2016; Oreshkova et al., 2013; Pluess, 2011). Nevertheless, we observe a heterozygote deficit, which results in significant deviations from Hardy-Weinberg equilibrium, even though the analysed trees grew in a large area (one hectare).
- 45 This was observed in the treeline area, spanning from dense forest to single-tree stands on the southern Taymyr Peninsula and which seems to be unaffected by the sampling area (Kruse et al., 2018). In general, this can be indicative of a higher degree of inbreeding among individuals and thus local recruitment outweighs immigration (Arenas et al., 2012; Hartl and Clark, 2007), although no straightforward pattern arises from the comparison of heterozygosity values (mean over all loci) among the three height classes (trees, saplings, seedlings).
- 50 Nevertheless, in detail, the amount of alleles in seedlings is lower at two loci, for which also the observed heterozygosity is lower than for the other two height classes. This trend was expected for seedlings at all loci, because younger cohorts typically show depressed heterozygosity, caused by the higher probability of local reproduction (Addisalem et al., 2016; Moran and Clark, 2012). Subsequently, due to self-thinning, selection takes place, generally preferring fitter individuals – assuming heterozygotes are generally fitter (heterosis effect, for example Babushkina et al., 2016) one expects the older an individual is, the fitter it is compared to other competitors.
- 55

Table S2. Heterozygosity values for each locus by height class. The analyses are based on 100 resampled datasets, rarefied to 30 individuals.

| Locus   | Trees    |          | Saplings |          | Seedlings |          |
|---------|----------|----------|----------|----------|-----------|----------|
|         | HO [%]   | HE [%]   | HO [%]   | HE [%]   | HO [%]    | HE [%]   |
| Ld101   | 55.9±8.5 | 77.4±4.8 | 53.8±8   | 79.7±3.8 | 60.8±8.2  | 78.8±3.6 |
| bclK056 | 62.5±8.9 | 91±1.4   | 55.2±8.2 | 90.1±1.6 | 64.2±7.4  | 91±1.1   |
| bclK189 | 79.1±6.8 | 88.8±2   | 70.2±7   | 89.3±1.6 | 72.8±6.5  | 88.3±1.5 |
| bclK211 | 68.6±7.2 | 88.5±2.5 | 63.7±6.7 | 89.4±1.9 | 66.4±6.7  | 89.2±1.8 |
| bclK228 | 70.8±7.8 | 87.9±1.6 | 68.5±7.5 | 88.4±1.3 | 65.4±7.5  | 89±1.4   |
| bclK253 | 80.1±8   | 83.8±2.5 | 80.3±6.1 | 83.8±2.6 | 81.2±6.4  | 83.3±2.7 |
| bclK263 | 90.1±4.8 | 93.8±0.8 | 89.6±4.5 | 93.8±0.7 | 86.3±5.3  | 92.6±0.9 |
| Ld42    | 54.3±8.6 | 76±3.2   | 64.3±8.1 | 74.9±2.9 | 53±7.8    | 77.5±2.7 |
| All     | 70.2±7.6 | 85.9±2.3 | 68.2±7   | 86.2±2.1 | 68.7±7    | 86.2±2   |

60

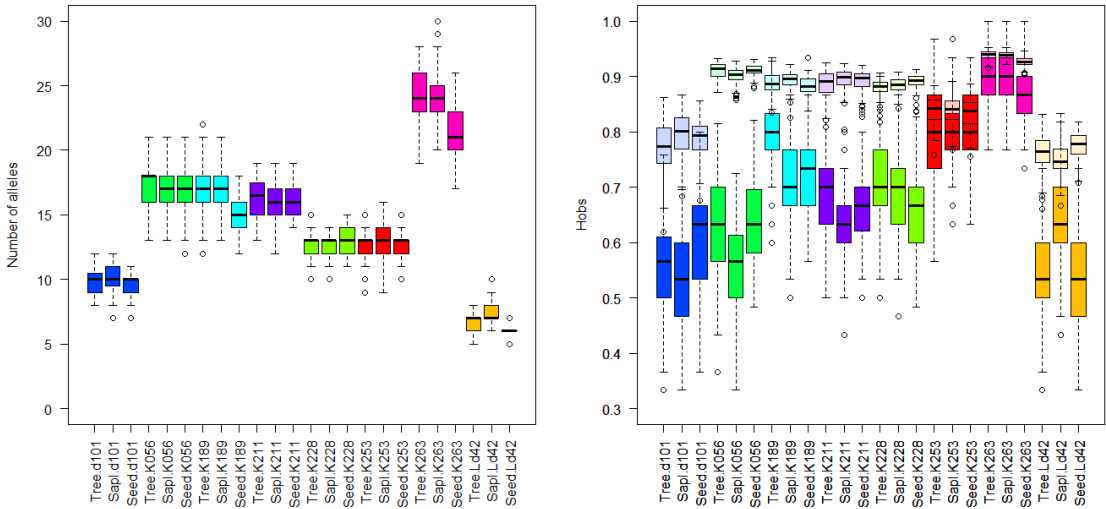

Figure S4. Left: Number of alleles, Right: Observed ( $H_0$ ) and expected ( $H_E$ ) heterozygosity. Based on a rarefied dataset of 30 individuals.

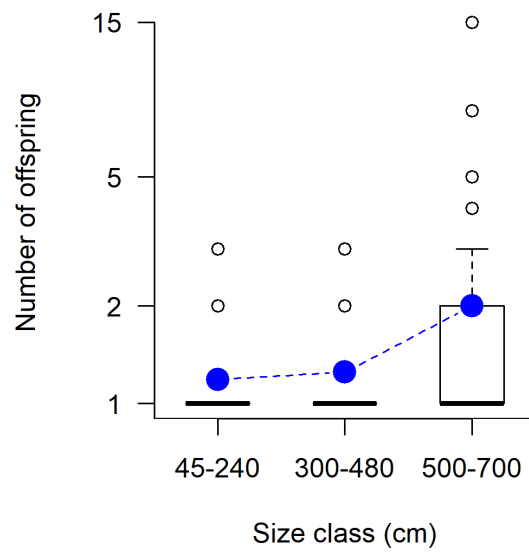

65

**Figure S5. Number of offspring assigned to a single parent in three size classes. Filled circles: mean values.**

## S2 Model adaptation

### S2.1 Program code adaptation

#### 70 S2.1.1 Seed dispersal function improvements

For each dispersed seed the wind direction is randomly drawn from vegetation period wind data of the year of its dispersal. The ballistic maximal flight distance  $E_0$  (Equation 1) is estimated by species-specific size parameters following the approach of Matlack (1987), where  $V_h$  is defined as the horizontal wind speed and is chosen correspondingly to the wind direction in the model. The release height  $H_t$  is roughly estimated at 75% of the individual's height.  $V_d$  is the descent rate for seeds and is estimated for *Larix gmelinii* by a linear regression using species data of Matlack (1987) for species having wing-scales attached to the seeds:  $V_d = 0.0032 * \sqrt{w} + 0.4807$  and is  $0.86 \text{ m s}^{-1}$ , with the wing loading  $w$  (Matlack 1987) for *L. gmelinii*, calculated by dividing the average seed weight (in microdyne) of 3.5 mg (Heit and Eliason, 1940; Lukkarinen et al., 2009) by the propagule area of  $0.2 \text{ cm}^2$  (Fu et al., 1999).

$$80 \quad E_0 = V_h \frac{H_t}{V_d} \quad (1)$$

This variable  $E_0$  controls the standard deviation of the Gaussian term in the dispersal function of the model which is named originally 'width' in Equation 5 in Kruse et al. (2016)), consisting of the two dispersal function terms

$DL_{gaussian}(rn) = \sqrt{2 * E_0^2 * -1 * \log(rn)}$  and  $DL_{fat-tailed}(rn) = rn^{(-1*(1+\alpha))}$ , with  $rn$  – random number uniformly distributed between 0 and 1,  $sdist$  – distance parameter for fitting and  $\alpha$  – scaling parameter for the fat tail of the function:

$$85 \quad DL_{gaussian,fat-tail}(rn) = sdist * 0.5 * \left( (0.5 * DL_{gaussian}(rn)) + (2 * DL_{fat-tailed}(rn)) \right) \quad (2)$$

#### S2.1.2 Growth function

The tree growth now depends only on July temperature, because climate-tree ring-width comparisons showed no significant influence of precipitation (data not shown). With the species-specific linear regression coefficients

90 we estimate the simulated tree growth in a year by  $julindex = \left( \frac{0.078}{1 + e^{14.825 - Julytemperature}} \right) + 0.108$ , which was further processed to the scale factor  $weatherfactor = \frac{julindex - minimalgrowth}{maximalgrowth - minimalgrowth}$ .

#### S2.1.3 Active layer thickness influences mortality

The influence of the active layer thaw depth on the diameter growth of larch trees is estimated based on the results of Nakai et al. (2008). It describes a linear relationship allowing 100% diameter growth at 100 cm thaw depth and only 10% when reaching 10 cm, which is the minimum value for *L. gmelinii*. The active layer thickness  $ALT$  (Equation 3) is estimated in metres for each year with the Stefan Formula, following simplifications by Hinkel and Nicholas (1995). It is determined by soil properties  $fe=0.050$  (Global Land Cover Characterization, Zhang et al., 2005) and the cumulative sum of daily temperatures exceeding the freezing points  $DDT$ :

$$95 \quad ALT(year) = 1.0 - fe * \sqrt{DDT(year)} \quad (3)$$

100 **Table S4. Overview of model parameters and processes for *L. gmelinii* individuals that differ from the original version (Kruse *et al.* 2016).**

| Parameter                                                                                        | Value and dimension            | References                                                                    |
|--------------------------------------------------------------------------------------------------|--------------------------------|-------------------------------------------------------------------------------|
| <i>Growth</i>                                                                                    |                                |                                                                               |
| Quadratic term of the equation for diameter growth rate                                          | -0.003 ln(cm) cm <sup>-2</sup> | data-based estimate similar to Fyllas <i>et al.</i> (2010)                    |
| Linear term of the growth function                                                               | 0.030 ln(cm) cm <sup>-1</sup>  |                                                                               |
| Constant term of the growth function                                                             | -1.98 ln(cm)                   |                                                                               |
| <i>Seed production, dispersal and establishment</i>                                              |                                |                                                                               |
| Factor of seed productivity                                                                      | 8                              | literature-based estimate (Krukliis & Milyutin, 1977, cited in Abaimov, 2010) |
| Background germination rate                                                                      | 0.01                           | estimated                                                                     |
| Horizontal seed dispersal distance at wind speed of 10 km/h                                      | 60.1 m                         | estimated after Matlack (1987)                                                |
| Seed descent rate                                                                                | 0.86 m s <sup>-1</sup>         | estimated descent rate based on Matlack (1987)                                |
| <i>Mortality</i>                                                                                 |                                |                                                                               |
| Background mortality rate                                                                        | 0.0001 yr <sup>-1</sup>        | data-based estimate                                                           |
| Current tree growth influence factor on tree mortality                                           | 0.0                            | estimated                                                                     |
| Weather influence factor on tree mortality                                                       | 0.1                            | estimated                                                                     |
| Density influence factor on tree mortality                                                       | 2.0                            | estimated                                                                     |
| Seed fertility                                                                                   | 2 yrs                          | Ban <i>et al.</i> (1998)                                                      |
| Mean temperature of the coldest month (January) at the border of the species' geographical range | -45 °C                         | Shugart <i>et al.</i> (1992)                                                  |
| Exponent scaling the height influence                                                            | 0.2                            | estimated                                                                     |
| <i>Weather processing</i>                                                                        |                                |                                                                               |
| Exponent scaling the influence of surrounding density for a tree                                 | 0.1                            | estimated                                                                     |
| Exponent scaling the density value                                                               | 0.5                            | estimated                                                                     |

## ***S2.2 Simulation results***

105 To explore potential settings (I) to decrease the amount of recruitment close to the mother trees, (II) to shift the effective dispersal peak by 2-3 m and (III) to increase the effective recruitment at medium distances (~30-40 m), we tuned two kinds of processes: parameters that determine the seed dispersal (model code: bcdopwxyzDEFGHIJK, Table S5) and tree density and parameters that set the impact of the tree's mortality (efghijklmnAC), or both (qrstuv) (details on individual adaptations in Table S5).

110 Of all 36 different simulations, some parameters decreased the amount of near mother effective seed dispersal (I) (cdo-zD-I) of which only (o-z) decreased the distance of up to 2 m based on the shifted dispersal function, while an increase in the distance parameter of the Gaussian-function peak improves the simulated function strongly (D-I) (Figure S8). Of these a shift towards farther distances and an increase in medium distances (II+III) was achieved with adaptations of the dispersal function only (oq-sx-zD-I), whereas the others only shifted the peak to ~5 m with a decrease for medium distances (pt-w). Nevertheless, the sum of squares of deviations from the  
115 observed pattern was improved in these candidates by a few sets (yzD-I) to within 66% to 82% of the reference run. The model performed best with parameter set "I" which is a combination of an adjusted dispersal function and increased seed production rate (Figure S7, Figure S8, Table S5). These sets increase the distance of dispersed seeds from the mother tree and the probability of a recruit growing at medium distances from its source was increased as well. Still the ratio of on-site recruitment was lower than observed (between 45.70 and 46.70  
120 compared to observed 56.77%). This was improved by other simulations (qt-wJ) but their general performance was weaker than the reference simulation.

## ***S2.3 Discussion of the simulation improvement***

In parts we achieved a good fit when increasing the peak of the dispersal function in the model to longer distances. The models where the distance from the centre of the distribution was shifted to 4 m improved the simulated  
125 effective seed dispersal distances best ("I"). However, the ratio between on-site recruitment and introductions from the exterior is around 10% lower than observed. This was not improved by the best-performing parameter set, but could be improved when changing the density competition, especially for small life stages ("t"). Combinations of both were tested but results were strongly deviated from observed situations ("C"). This smaller ratio points to an unrealistically high long-distance dispersed seed fraction. Here, we focus on the effective seed  
130 dispersal distance at short distances. Nevertheless, long-distance dispersal should be improved too, especially if one aims to conduct simulation studies over larger extents. It could be improved by decreasing the fat tail probability of the exponential part in the dispersal function, or by manipulating the implementation of the wind speed influence to a nonlinear process, decreasing the distances for strong winds. We analysed only one area at the treeline, which improved our understanding of the processes incorporated in the simulation model, but this  
135 may overemphasise the effective seed dispersal of one subpopulation. Therefore further validation by more plot-based analyses is needed for the general function parameters.



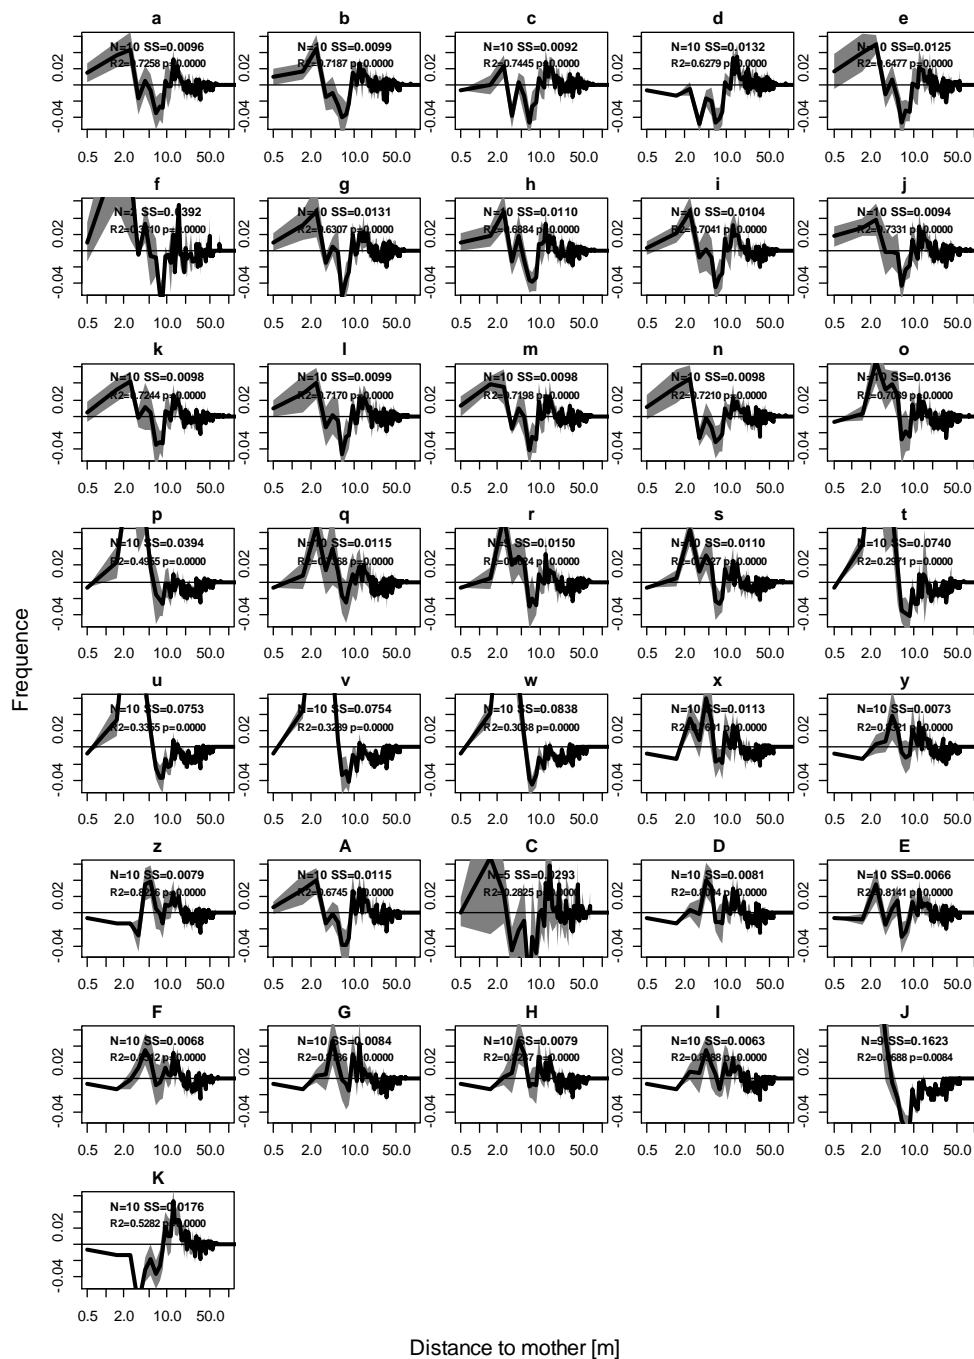

Distance to mother [m]

Figure S7. Deviations of simulated versus observed effective seed dispersal. SS – sum of squares,  $R^2$  – square of correlation between the mean simulated series and the observed value, p – significance of correlation coefficient. Letters (a-zA-K) refer to a special simulation run s. Table S5 for details.

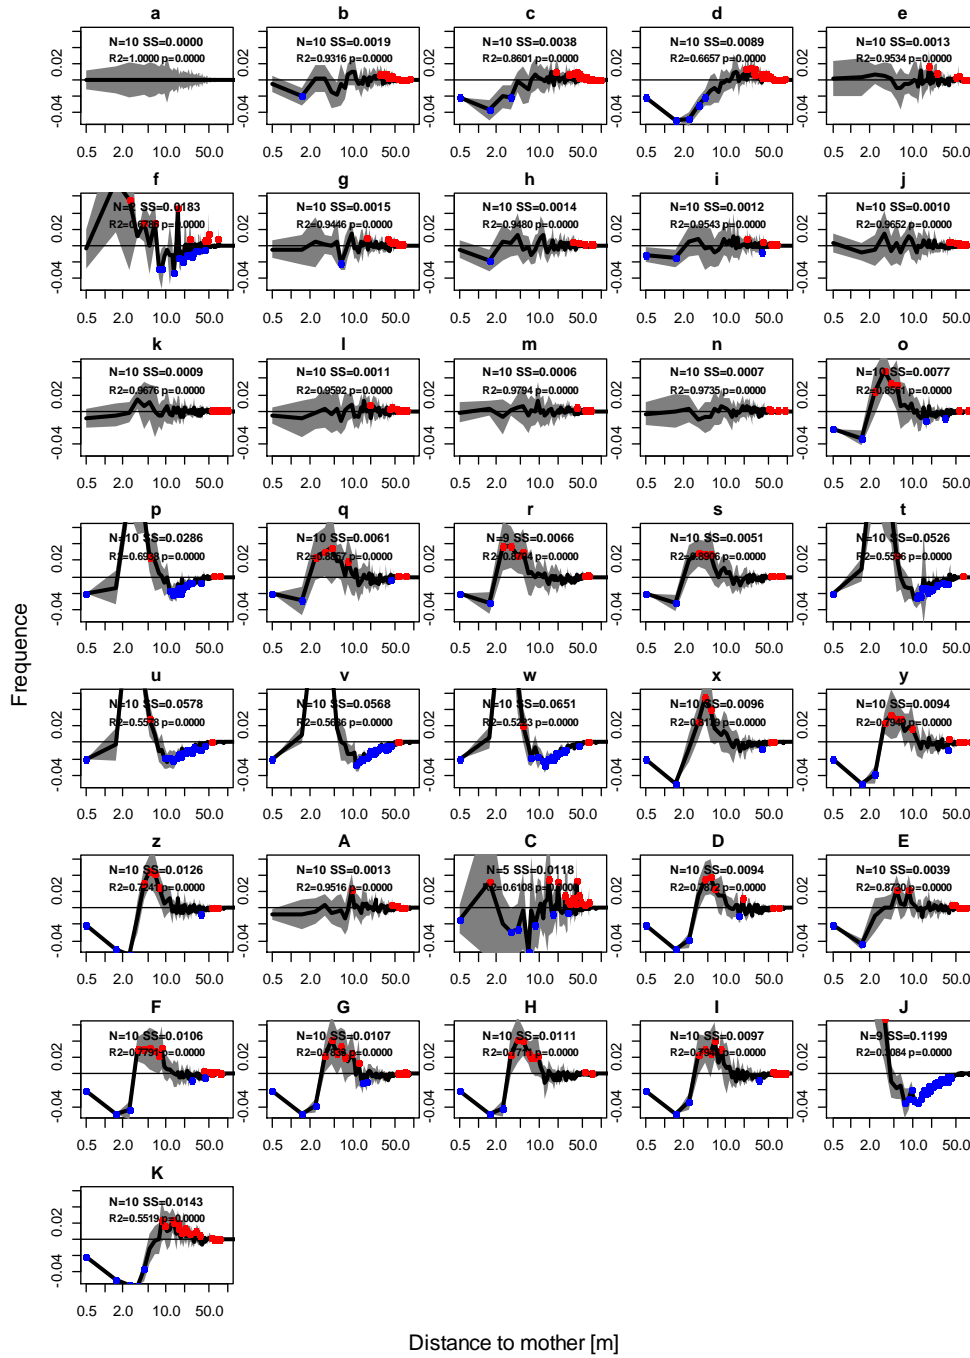

**Figure S8.** Deviations of effective seed dispersal distances of all runs from the reference simulation "a". Grey areas are the standard deviation of all runs. Red and blue dots indicate values outside (above and below respectively) the standard deviation of the base run. Letters (a-zA-K) refer to a special simulation run s. Table S5 for details.

**Table S5. Results of effective seed dispersal in adapted simulations. Changes identifier: 1-dispersal function manipulation, 2-density calculation manipulation, 3-combinations of 1 and 2.**

| I        | Changes | Dispersal function |               |               | On-site recruitment ratio |      |                |                 | Model parameters                                      |                                                         |
|----------|---------|--------------------|---------------|---------------|---------------------------|------|----------------|-----------------|-------------------------------------------------------|---------------------------------------------------------|
|          |         | SS                 | r             | r2            | Ratio                     | SD   | N>10 in center | p diff from obs | Adaptation and expected outcome                       | Parameter <sup>1</sup>                                  |
| <b>D</b> | -       | 0.0096             | 0.8519        | 0.7258        | 46.8%                     | 1.3% | 10             | 0.0000          | - reference run -                                     | Kruse <i>et al.</i> (2016)                              |
| <b>a</b> | 1       | 0.0099             | 0.8478        | 0.7187        | 45.4%                     | 1.4% | 10             | 0.0000          | longer dispersal distances                            | Sdist=1                                                 |
| <b>b</b> | 1       | 0.0092             | 0.8629        | 0.7445        | 41.0%                     | 1.2% | 10             | 0.0000          | longer dispersal distances                            | Sdist=5                                                 |
| <b>c</b> | 1       | 0.0132             | 0.7924        | 0.6279        | 38.1%                     | 1.0% | 10             | 0.0000          | longer dispersal distances                            | Sdist=10                                                |
| <b>d</b> | 2       | 0.0125             | 0.8048        | 0.6477        | 46.3%                     | 1.7% | 10             | 0.0000          | larger distance to mother trees                       | mdichte=3                                               |
| <b>e</b> | 2       | 0.0392             | 0.5754        | 0.3310        | 45.6%                     | 6.7% | 3              | <b>0.1023</b>   | smaller distance to mother trees                      | $f_{HAI}=5$                                             |
| <b>f</b> | 2       | 0.0131             | 0.7942        | 0.6307        | 44.8%                     | 2.3% | 10             | 0.0000          | larger distance to mother trees                       | $f_{HAI}=15$                                            |
| <b>g</b> | 2       | 0.0110             | 0.8297        | 0.6884        | 45.9%                     | 2.6% | 10             | 0.0000          | less exclusion close to mother tree                   | dichtewertmanipulatorexp=0.05                           |
| <b>h</b> | 2       | 0.0104             | 0.8391        | 0.7041        | 48.4%                     | 2.1% | 10             | 0.0000          | higher exclusion close to mother tree                 | dichtewertmanipulatorexp=0.15                           |
| <b>i</b> | 2       | 0.0094             | 0.8562        | 0.7331        | 46.2%                     | 1.7% | 10             | 0.0000          | higher exclusion close to mother tree                 | densitysmallweighing=1                                  |
| <b>j</b> | 2       | 0.0098             | 0.8511        | 0.7244        | 47.0%                     | 1.2% | 10             | 0.0000          | less exclusion close to mother tree                   | densitytreetile=0                                       |
| <b>k</b> | 2       | 0.0099             | 0.8467        | 0.7170        | 51.5%                     | 2.2% | 10             | 0.0000          | higher exclusion close to mother tree                 | densitytreetile=1                                       |
| <b>l</b> | 2       | 0.0098             | 0.8484        | 0.7198        | 46.9%                     | 0.7% | 10             | 0.0000          | higher exclusion close to mother tree                 | densitytiletree=1                                       |
| <b>m</b> | 2       | 0.0098             | 0.8491        | 0.7210        | 47.7%                     | 1.3% | 10             | 0.0000          | higher exclusion close to mother tree                 | densitymaxreduction=1                                   |
| <b>n</b> | 2       | 0.0136             | 0.8390        | 0.7039        | 47.9%                     | 2.2% | 10             | 0.0000          | more distant from centre and more intense peak        | Sdist=1 + $r_{GaussExpDisp}=1.0 + d_{GaussCentre}=2.0$  |
| <b>o</b> | 1       | 0.0394             | 0.7039        | 0.4955        | 49.9%                     | 3.2% | 10             | 0.0001          | shorter dispersal distances                           | $o + d_{GaussDistance}=D * 0.5$                         |
| <b>p</b> | 3       | 0.0115             | 0.8584        | 0.7368        | 52.0%                     | 2.0% | 10             | 0.0000          | higher exclusion close to mother tree                 | $o + densitytreetile=1$                                 |
| <b>q</b> | 3       | 0.0150             | 0.8139        | 0.6624        | 49.3%                     | 2.8% | 9              | 0.0000          | less exclusion close to mother tree                   | $o + dichtewertmanipulatorexp=0.15$                     |
| <b>r</b> | 3       | 0.0110             | 0.8560        | 0.7327        | 44.7%                     | 1.2% | 10             | 0.0000          | higher exclusion close to mother tree                 | $o + densitytiletree=3$                                 |
| <b>s</b> | 3       | 0.0699             | 0.5795        | 0.3358        | 52.4%                     | 4.4% | 10             | <b>0.0113</b>   | increased tree density                                | $o + treedensity^{0.9}$                                 |
| <b>t</b> | 3       | 0.0706             | 0.5957        | 0.3548        | 50.9%                     | 2.1% | 10             | 0.0000          | increased tree density                                | $o + treedensity^{0.95}$                                |
| <b>u</b> | 3       | 0.0788             | 0.5627        | 0.3166        | 51.0%                     | 1.3% | 5              | 0.0006          | weakened tree density                                 | $o + treedensity^{1.1}$                                 |
| <b>v</b> | 1       | 0.0838             | 0.5512        | 0.3038        | 52.0%                     | 2.0% | 10             | 0.0000          | shortened dispersal distance                          | $o + d_{GaussDistance}=D^{0.5}$                         |
| <b>w</b> | 1       | 0.0113             | 0.8718        | 0.7601        | 47.7%                     | 1.4% | 10             | 0.0000          | more distant from centre and more intense peak        | Sdist=1 + $r_{GaussExpDisp}=1.0 + d_{GaussCentre}=3.0$  |
| <b>x</b> | 1       | 0.0073             | 0.9122        | <b>0.8321</b> | 47.4%                     | 1.3% | 10             | 0.0000          | more distant from centre and more intense peak        | Sdist=1 + $r_{GaussExpDisp}=1.0 + d_{GaussCentre}=4.0$  |
| <b>y</b> | 1       | 0.0079             | 0.9070        | 0.8226        | 46.7%                     | 2.2% | 10             | 0.0000          | more distant from centre and more intense peak        | Sdist=1 + $r_{GaussExpDisp}=1.0 + d_{GaussCentre}=5.0$  |
| <b>z</b> | 2       | 0.0115             | 0.8213        | 0.6745        | 48.6%                     | 2.9% | 10             | 0.0000          | higher exclusion close to mother tree                 | linear density 0-200 cm 1-0 extra mortality             |
| <b>A</b> | 2       | 0.0293             | 0.5315        | 0.2825        | 50.2%                     | 7.5% | 7              | <b>0.0613</b>   | higher exclusion close to mother tree                 | negative quadratic density 0-200 cm 5-0 extra mortality |
| <b>B</b> | 1       | 0.0081             | 0.8997        | 0.8094        | 45.9%                     | 0.9% | 10             | 0.0000          | increased seed production higher on-site reproduction | $y + f_s=16$ (twice standard)                           |
| <b>C</b> | 1       | <b>0.0066</b>      | 0.9023        | 0.8141        | 45.7%                     | 1.8% | 10             | 0.0000          | more distant shifted dispersal peak                   | $o + d_{GaussDistance}=D * 1.5$                         |
| <b>D</b> | 1       | <b>0.0068</b>      | 0.9226        | <b>0.8512</b> | 46.2%                     | 1.2% | 10             | 0.0000          | increased seed production higher on-site reproduction | $y + f_s=12$                                            |
| <b>E</b> | 1       | 0.0084             | 0.9048        | 0.8186        | 46.6%                     | 1.6% | 10             | 0.0000          | increased seed production higher on-site reproduction | $y + f_s=9$                                             |
| <b>F</b> | 1       | 0.0079             | 0.9103        | 0.8287        | 45.7%                     | 1.2% | 10             | 0.0000          | increased seed production higher on-site reproduction | $y + f_s=10$                                            |
| <b>G</b> | 1       | <b>0.0063</b>      | <b>0.9267</b> | <b>0.8588</b> | 46.4%                     | 1.7% | 10             | 0.0000          | increased seed production higher on-site reproduction | $y + f_s=11$                                            |
| <b>H</b> | 1       | 0.1623             | 0.2624        | 0.0688        | 54.9%                     | 4.0% | 9              | 0.2023          | higher on-site reproduction                           | a + no exponential dispersal                            |
| <b>I</b> | 1       | 0.0176             | 0.7268        | 0.5282        | 44.8%                     | 1.3% | 10             | 0.0000          | higher on-site reproduction                           | l + no exponential dispersal                            |

1 – abbreviations following Kruse *et al.* (2016)

## 150 **References**

- Abaimov, A. P.: Permafrost Ecosystems, edited by A. Osawa, O. A. Zyryanova, Y. Matsuura, T. Kajimoto, and R. W. Wein, Springer Netherlands, Dordrecht., 2010.
- Addisalem, A. B., Duminil, J., Wouters, D., Bongers, F. and Smulders, M. J. M.: Fine-scale spatial genetic structure in the frankincense tree *Boswellia papyrifera* (Del.) Hochst. and implications for conservation, Tree Genet. Genomes, 12(5), 86, doi:10.1007/s11295-016-1039-2, 2016.
- 155 Arenas, M., Ray, N., Currat, M. and Excoffier, L.: Consequences of range contractions and range shifts on molecular diversity, Mol. Biol. Evol., 29(1), 207–218, doi:10.1093/molbev/msr187, 2012.
- Babushkina, E. A., Vaganov, E. A., Grachev, A. M., Oreshkova, N. V., Belokopytova, L. V., Kostyakova, T. V. and Krutovsky, K. V.: The effect of individual genetic heterozygosity on general homeostasis, heterosis and resilience in Siberian larch (*Larix sibirica* Ledeb.) using dendrochronology and microsatellite loci genotyping, Dendrochronologia, 38, 26–37, 2016.
- 160 Ban, Y., Xu, H., Bergeron, Y. and Kneeshaw, D. D.: Gap regeneration of shade-intolerant *Larix gmelini* in old-growth boreal forests of northeastern China, J. Veg. Sci., 9(4), 529–536, doi:10.2307/3237268, 1998.
- Culley, T. M., Weller, S. G., Sakai, A. K. and Putnam, K. A.: Characterization of microsatellite loci in the Hawaiian endemic shrub *Schiedea adamantis* (Caryophyllaceae) and amplification in related species and genera, Mol. Ecol. Resour., 8(5), 1081–1084, doi:10.1111/j.1755-0998.2008.02161.x, 2008.
- 165 Fu, L., Li, N. and Mill, R. R.: Sections on Cephalotaxaceae, Ginkgoaceae and Pinaceae, in Flora of China, edited by W. Zheng-yi and P. H. Raven, pp. 11–52, Science Press; St. Louis: Missouri Botanical Garden, Beijing., 1999.
- Fyllas, N. M., Politi, P. I., Galanidis, A., Dimitrakopoulos, P. G. and Arianoutsou, M.: Simulating regeneration and vegetation dynamics in Mediterranean coniferous forests, Ecol. Model., 221(11), 1494–1504, doi:10.1016/j.ecolmodel.2010.03.003, 2010.
- 170 Gamache, I., Jaramillo-Correa, J. P., Payette, S. and Bousquet, J.: Diverging patterns of mitochondrial and nuclear DNA diversity in subarctic black spruce: imprint of a founder effect associated with postglacial colonization., Mol. Ecol., 12(4), 891–901 [online] Available from:
- 175 <http://www.ncbi.nlm.nih.gov/pubmed/12753210>, 2003.
- Hartl, D. L. and Clark, A. G.: Principles Of Population Genetics, 4th ed., Sinauer Associates, Inc. Publishers, Sunderland, Massachusetts, USA., 2007.
- Heit, E. C. and Eliason, E. J.: Coniferous tree seed testing and factors affecting germination and seed quality, Tech. Bull. New York State Agric. Exp. Stn., 255, 1–45, 1940.
- 180 Hinkel, K. M. and Nicholas, J. R. J.: Active layer thaw rate at a boreal forest site in central Alaska, USA, Arct. Alp. Res., 1, 72–80, 1995.
- Isoda, K. and Watanabe, A.: Isolation and characterization of microsatellite loci from *Larix kaempferi*, Mol. Ecol. Notes, 6(3), 664–666, doi:10.1111/j.1471-8286.2006.01291.x, 2006.

- 185 Kruse, S., Wieczorek, M., Jeltsch, F. and Herzschuh, U.: Treeline dynamics in Siberia under changing climates as inferred from an individual-based model for *Larix*, *Ecol. Model.*, 338, 101–121, doi:10.1016/j.ecolmodel.2016.08.003, 2016.
- Kruse, S., Epp, L. S., Wieczorek, M., Pestryakova, L. A., Stoof-Leichsenring, K. R. and Herzschuh, U.: High gene flow and complex treeline dynamics of *Larix* Mill. stands on the Taymyr Peninsula (north-central Siberia) revealed by nuclear microsatellites, *Tree Genet. Genomes*, 14(2), 19, doi:10.1007/s11295-018-1235-3, 2018.
- 190 Laberge, M.-J., Payette, S. and Bousquet, J.: Life span and biomass allocation of stunted black spruce clones in the subarctic environment, *J. Ecol.*, 88, 584–593, 2000.
- Lukkarinen, A. J., Ruotsalainen, S., Nikkanen, T. and Peltola, H.: The Growth Rhythm and Height Growth of Seedlings of Siberian (*Larix sibirica* Ledeb.) and Dahurian (*Larix gmelinii* Rupr.) Larch Provenances in Greenhouse Conditions, *Silva Fenn.*, 43(1), 5–20, 2009.
- 195 Matlack, G. R.: Diaspore size, shape, and fall behavior in wind-dispersed plant species, *Am. J. Bot.*, 74(8), 1150–1160, doi:10.2307/2444151, 1987.
- Moran, E. V. and Clark, J. S.: Between-site differences in the scale of dispersal and gene flow in red oak, *PLoS One*, 7(5), e36492, doi:10.1371/journal.pone.0036492, 2012.
- Nakai, Y., Matsuura, Y., Kajimoto, T., Abaimov, a. P., Yamamoto, S. and Zyryanova, O. a.: Eddy covariance CO<sub>2</sub> flux above a Gmelin larch forest on continuous permafrost in Central Siberia during a growing season, *Theor. Appl. Climatol.*, 93(3–4), 133–147, doi:10.1007/s00704-007-0337-x, 2008.
- 200 Oreshkova, N. V., Belokon, M. M. and Jamiyansuren, S.: Genetic diversity, population structure, and differentiation of Siberian larch, Gmelin larch, and Cajander larch on SSR-marker data, *Russ. J. Genet.*, 49(2), 178–186, doi:10.1134/S1022795412120095, 2013.
- 205 Paradis, E.: Pegas: An R package for population genetics with an integrated-modular approach, *Bioinformatics*, 26(3), 419–420, doi:10.1093/bioinformatics/btp696, 2010.
- Pluess, A. R.: Pursuing glacier retreat: genetic structure of a rapidly expanding *Larix decidua* population, *Mol. Ecol.*, 20(3), 473–485, doi:10.1111/j.1365-294X.2010.04972.x, 2011.
- 210 Schuelke, M.: An economic method for the fluorescent labeling of PCR fragments A poor man's approach to genotyping for research and high-throughput diagnostics., *Nat. Biotechnol.*, 18(February), 233–234, 2000.
- Shugart, H. H., Leemans, R. and Bonan, G. B.: A Systems Analysis of the Global Boreal Forest, edited by H. H. Shugart, R. Leemans, and G. B. Bonan, Cambridge University Press, Cambridge, UK., 1992.
- Wagner, S., Gerber, S. and Petit, R. J.: Two highly informative dinucleotide SSR multiplexes for the conifer *Larix decidua* (European larch)., *Mol. Ecol. Resour.*, 12(4), 717–25, doi:10.1111/j.1755-0998.2012.03139.x, 2012.
- 215 Zhang, T., Frauenfeld, O. W., Serreze, M. C., Etringer, A., Oelke, C., McCreight, J., Barry, R. G., Gilichinsky, D., Yang, D., Ye, H. and others: Spatial and temporal variability in active layer thickness over the Russian Arctic drainage basin, *J. Geophys. Res.*, 110(D16), D16101, doi:10.1029/2004JD005642, 2005.
